# Supplementary material for: Electrospun PLGA Fiber Diameter and Alignment of Tendon Biomimetic Fleece Potentiate Tenogenic Differentiation and Immunomodulatory Function of Amniotic Epithelial Stem Cells
Source: PubMed Central journal article supplement (PMC7290802; doi:10.3390/cells9051207), 2020-05-13
Supplement: cells-09-01207-s001.pdf [file cells-09-01207-s001.pdf]

**Table S1****Table S1.** Sequences of primers and conditions used in Real-Time qPCR.

| Gene                          | Primer sequences                                                 | Annealing T <sub>m</sub> (°C) |
|-------------------------------|------------------------------------------------------------------|-------------------------------|
| <i>COL1</i> <sup>[35]</sup>   | F: 5'-CGTGATCTGCGACGAACTTAA-3'<br>R: 5'-GTCCAGGAAGTCCAGGTTGT-3'  | 62                            |
| <i>TNMD</i> <sup>[35]</sup>   | F: 5'-TGGTGAAGACCTTCACTTCC-3'<br>R: 5'-TTAAACCCTCCCCAGCATGC-3'   | 62                            |
| <i>SCXB</i> <sup>[35]</sup>   | F: 5'-AACAGCGTGAACACGGCTTTC-3'<br>R: 5'-TTTCTCTGGTTGCTGAGGCAG-3' | 64                            |
| <i>IL-6</i> <sup>[67]</sup>   | F: 5'-ACCTGGACTTCCTCCAGAAC-3'<br>R: 5'-TTGAGGACTGCATCTTCTCC-3'   | 62                            |
| <i>IL-4</i> <sup>[67]</sup>   | F: 5'-AAGCCCTCAGCTAAGCATGT-3'<br>R: 5'-AGGCATCACAGGCTCAAGTC-3'   | 63.2                          |
| <i>IL-10</i> <sup>[67]</sup>  | F: 5'-CCAGGATGGTGACTCGACTAG-3'<br>R: 5'-TGGCTCTGCTCTCCCAGAAC-3'  | 65.3                          |
| <i>IL-12b</i> <sup>[67]</sup> | F: 5'-TCAAACCAGACCCACCCAAG-3'<br>R: 5'-CACAGATGCCCATTCCTCC-3'    | 65.6                          |
| <i>GAPDH</i> <sup>[67]</sup>  | F: 5'-TCGGAGTGAACGGATTTGGC-3'<br>R: 5'-CCGTTCTCTGCCTTGACTGT-3'   | 64.4                          |
